# Supplementary material for: Feasibility and Acceptability of a Student-Led Lifestyle (Diet and Exercise) Intervention Within a Residential Rehabilitation Setting for People With Severe Mental Illness, GO HEART (Group Occupation, Health, Exercise And Rehabilitation Treatment)
Source: PubMed Central journal article supplement (PMC7198865; doi:10.3389/fpsyt.2020.00319), 2020-04-28
Supplement: Table_1.pdf [file Table_1.pdf]

| <b>Supplementary Table 1 - Dietetics Program Acceptability Questionnaire (n=26)</b>    | <b>Poor<br/>n (%)</b>     | <b>Average<br/>n (%)</b> | <b>Excellent<br/>n (%)</b> |
|----------------------------------------------------------------------------------------|---------------------------|--------------------------|----------------------------|
| How would you rate our experience attending the UQ dietetics student program?          | 1 (4)                     | 6 (23)                   | 19 (73)                    |
|                                                                                        | <b>Disagree<br/>n (%)</b> | <b>Neutral<br/>n (%)</b> | <b>Agree<br/>n (%)</b>     |
| Was your UQ dietetics student program challenging enough for you?                      | 4 (15)                    | 4 (15)                   | 18 (70)                    |
| Do you feel your knowledge of healthy eating has improved?                             | 0 (0)                     | 4 (15)                   | 22 (85)                    |
| Would you like to continue with your using these skills after the study?               | 1 (4)                     | 1 (4)                    | 24 (92)                    |
| Would you recommend this UQ dietetics student program for other people?                | 1 (4)                     | 2 (8)                    | 23 (88)                    |
| Have you noticed other improvements in yourself following this healthy eating program? | 0 (0)                     | 5 (19)                   | 21 (81)                    |
