# Supplementary material for: Feasibility and Acceptability of a Student-Led Lifestyle (Diet and Exercise) Intervention Within a Residential Rehabilitation Setting for People With Severe Mental Illness, GO HEART (Group Occupation, Health, Exercise And Rehabilitation Treatment)
Source: PubMed Central journal article supplement (PMC7198865; doi:10.3389/fpsyt.2020.00319), 2020-04-28
Supplement: Table_2.pdf [file Table_2.pdf]

| <b>Supplementary Table 2 -<br/>Exercise Program Acceptability Questionnaire (n = 21)</b> | <b>Disagree<br/>n (%)</b> | <b>Neutral<br/>n (%)</b> | <b>Agree<br/>n (%)</b> |
|------------------------------------------------------------------------------------------|---------------------------|--------------------------|------------------------|
| I feel satisfied with the exercise program                                               | 1 (4)                     | 2 (10)                   | 18 (86)                |
| I would like to continue this program after the study ends                               | 2 (10)                    | 4 (19)                   | 15 (71)                |
| I found the exercise program enjoyable                                                   | 2 (10)                    | 0 (0)                    | 19 (90)                |
| I found the seated bicycle enjoyable                                                     | 2 (10)                    | 11 (52)                  | 8 (38)                 |
| I found the exercise boring                                                              | 16 (76)                   | 2 (10)                   | 3 (14)                 |
| I would have preferred exercising individually (not in a group)                          | 9 (43)                    | 9 (43)                   | 3 (14)                 |
| I looked forward to the exercise sessions                                                | 4 (19)                    | 3 (14)                   | 14 (67)                |
| I found the stretching bands enjoyable                                                   | 3 (14)                    | 3 (14)                   | 15 (71)                |
| I would feel confident doing this kind of exercise without assistance                    | 3 (14)                    | 4 (19)                   | 14 (67)                |
| I found the boxing elements enjoyable                                                    | 3 (14)                    | 8 (38)                   | 10 (48)                |
| I would feel confident being able to do this kind of exercise when having a bad day      | 5 (24)                    | 4 (19)                   | 12 (57)                |
| I found the treadmill/walking elements enjoyable                                         | 2 (10)                    | 9 (43)                   | 10 (48)                |
| I found the following strength elements enjoyable: hand weights                          | 2 (17)                    | 3 (14)                   | 16 (76)                |
| I found the medicine ball enjoyable                                                      | 4 (19)                    | 3 (14)                   | 14 (67)                |
| I found the exercise too hard                                                            | 11 (52)                   | 9 (43)                   | 1 (4)                  |
| I found the group setting enjoyable                                                      | 1 (4)                     | 2 (10)                   | 18 (86)                |
| I would have preferred more sports in the exercise program                               | 3 (14)                    | 6 (29)                   | 12 (57)                |
| I would have liked the exercise program to be more challenging                           | 8 (38)                    | 10 (48)                  | 3 (14)                 |
| I found the rope enjoyable                                                               | 5 (24)                    | 4 (19)                   | 12 (57)                |
| I wish the exercise program was more fun                                                 | 9 (43)                    | 4 (19)                   | 8 (38)                 |
