# Supplementary material for: Feasibility and Acceptability of a Student-Led Lifestyle (Diet and Exercise) Intervention Within a Residential Rehabilitation Setting for People With Severe Mental Illness, GO HEART (Group Occupation, Health, Exercise And Rehabilitation Treatment)
Source: PubMed Central journal article supplement (PMC7198865; doi:10.3389/fpsyt.2020.00319), 2020-04-28
Supplement: Table_3.pdf [file Table_3.pdf]

| <b>Table 3 - Dietetics Program Acceptability Questionnaire, complete responses<br/>N=26</b> |                          |                   |                   |                   |                       |      |
|---------------------------------------------------------------------------------------------|--------------------------|-------------------|-------------------|-------------------|-----------------------|------|
|                                                                                             | <b>Very poor</b>         | <b>Poor</b>       | <b>Neutral</b>    | <b>Good</b>       | <b>Excellent</b>      |      |
|                                                                                             | <b>1<br/>n(%)</b>        | <b>2<br/>n(%)</b> | <b>3<br/>n(%)</b> | <b>4<br/>n(%)</b> | <b>5<br/>n(%)</b>     |      |
| How would you rate our experience attending the UQ dietetics student program?               | 0                        | 1(4)              | 6(23)             | 16(61)            | 3(11)                 | N=26 |
|                                                                                             | <b>Strongly disagree</b> | <b>Disagree</b>   | <b>Neutral</b>    | <b>Agree</b>      | <b>Strongly Agree</b> |      |
|                                                                                             | <b>1<br/>n(%)</b>        | <b>2<br/>n(%)</b> | <b>3<br/>n(%)</b> | <b>4<br/>n(%)</b> | <b>7<br/>n(%)</b>     |      |
| Was your UQ dietetics student program challenging enough for you?                           | 0                        | 4(15)             | 4(15)             | 11(42)            | 7(27)                 | N=26 |
| Do you feel your knowledge of healthy eating has improved?                                  | 0                        | 0                 | 5(19)             | 14(53)            | 7(27)                 | N=26 |
| Would you like to continue with your using these skills after the study?                    | 0                        | 1(4)              | 1(4)              | 20(76)            | 4(15)                 | N=26 |
| Would you recommend this UQ dietetics student program for other people?                     | 0                        | 1(4)              | 2(8)              | 15(58)            | 8(31)                 | N=26 |
| Have you noticed other improvements in yourself following this healthy eating program?      | 0                        | 0                 | 5(19)             | 14(53)            | 7(27)                 | N=26 |
