# Supplementary material for: Feasibility and Acceptability of a Student-Led Lifestyle (Diet and Exercise) Intervention Within a Residential Rehabilitation Setting for People With Severe Mental Illness, GO HEART (Group Occupation, Health, Exercise And Rehabilitation Treatment)
Source: PubMed Central journal article supplement (PMC7198865; doi:10.3389/fpsyt.2020.00319), 2020-04-28
Supplement: Table_4.pdf [file Table_4.pdf]

**Supplementary Table 4, Exercise Acceptability Questionnaire,  
complete responses on likert scale**

|          |                                                                                     | <b>Strongly<br/>Disagree<br/>n(%)</b> | <b>Disagree<br/>n(%)</b> | <b>Neither<br/>agree<br/>nor<br/>disagree<br/>n(%)</b> | <b>Agree<br/>n(%)</b> | <b>Strongly<br/>Agree<br/>n(%)</b> |
|----------|-------------------------------------------------------------------------------------|---------------------------------------|--------------------------|--------------------------------------------------------|-----------------------|------------------------------------|
| <b>a</b> | I feel satisfied with the exercise program                                          |                                       | 1(5)                     | 2(9)                                                   | 13(62)                | 5(24)                              |
| <b>b</b> | I would like to continue this program after the study ends                          |                                       | 2(9)                     | 4(19)                                                  | 11(52)                | 4(19)                              |
| <b>c</b> | I found the exercise program enjoyable                                              |                                       | 2(9)                     |                                                        | 16(76)                | 3(14)                              |
| <b>d</b> | I found the seated bicycle enjoyable                                                |                                       | 2(9)                     | 11(52)                                                 | 8(38)                 |                                    |
| <b>e</b> | I found the exercise boring                                                         | 3(14)                                 | 13(62)                   | 2(9)                                                   | 3(14)                 |                                    |
| <b>f</b> | I would have preferred exercising individually (not in a group)                     |                                       | 9(43)                    | 9(43)                                                  | 2(9)                  | 1(5)                               |
| <b>g</b> | I looked forward to the exercise sessions                                           |                                       | 4(19)                    | 3(14)                                                  | 12(57)                | 2(9)                               |
| <b>h</b> | I found the stretching bands enjoyable                                              |                                       | 3(14)                    | 3(14)                                                  | 14(67)                | 1(5)                               |
| <b>i</b> | I would feel confident doing this kind of exercise without assistance               | 1(5)                                  | 2(9)                     | 4(19)                                                  | 8(38)                 |                                    |
| <b>j</b> | I found the boxing elements enjoyable                                               |                                       | 3(14)                    | 8(38)                                                  | 9(43)                 | 1(5)                               |
| <b>k</b> | I would feel confident being able to do this kind of exercise when having a bad day | 1(5)                                  | 4(19)                    | 4(19)                                                  | 12                    |                                    |
| <b>m</b> | I found the treadmill/walking elements enjoyable                                    |                                       | 2(9)                     | 9(43)                                                  | 8(38)                 | 2(9)                               |
| <b>n</b> | I found the following strength elements enjoyable: hand weights                     |                                       | 2(9)                     | 3(14)                                                  | 15(71)                | 1(5)                               |
| <b>o</b> | I found the medicine ball enjoyable                                                 |                                       | 2(9)                     | 3(14)                                                  | 14(67)                |                                    |
| <b>p</b> | I found the exercise too hard                                                       | 1(5)                                  | 10(48)                   | 9(43)                                                  | 1(5)                  |                                    |
| <b>r</b> | I found the group setting enjoyable                                                 |                                       | 1(5)                     | 2(9)                                                   | 15(71)                | 3(14)                              |
| <b>s</b> | I would have preferred more sports in the exercise program                          |                                       | 3(14)                    | 6(29)                                                  | 8(38)                 | 4(19)                              |
| <b>t</b> | I would have liked the exercise program to be more challenging                      | 1(5)                                  | 7(33)                    | 10(48)                                                 | 3(14)                 |                                    |
| <b>u</b> | I found the rope enjoyable                                                          | 1(5)                                  | 4(19)                    | 4(19)                                                  | 11(52)                | 1(5)                               |
| <b>v</b> | I wish the exercise program was more fun                                            | 2(9)                                  | 7(33)                    | 4(19)                                                  | 5(24)                 | 3(14)                              |
